# Supplementary material for: Pharmacogenetic Discovery in CALGB (Alliance) 90401 and Mechanistic Validation of a VAC14 Polymorphism that Increases Risk of Docetaxel-Induced Neuropathy
Source: Oxford University Press journal article supplement (doi:10.1158/1078-0432.ccr-15-2823), 2016-05-03
Supplement: 10780432ccr152823-sup-158490_1_supp_3391914_131ttp.doc [file 10780432ccr152823-sup-158490_1_supp_3391914_131ttp.doc]

**Supplementary Table 1**: Number of patients who experienced neuropathy, completed treatment without neuropathy and discontinued treatment early without having neuropathy while on study and within each range of cumulative treatment.

|  | | Cumulative Docetaxel Dose (mg/m2) | | | | | |
| --- | --- | --- | --- | --- | --- | --- | --- |
| Identifiable Outcome | | <500 | 500-999 | 1000-1499 | 1500-1999 | 2000+ | Total |
| Experienced Neuropathy | | 13 | 31 | 3 | 3 | 0 | 50 (8%) |
| Completed 2 years of treatment | | 0 | 0 | 0 | 1 | 23 | 24 (4%) |
| Discontinued treatment due to death or progression | Death | 12 | 1 | 2 | 0 | 1 | 16 |
| Progression | 98 | 78 | 26 | 14 | 7 | 223 |
| **Total** | 110 | 79 | 28 | 14 | 8 | 239 (38%) |
| Discontinued treatment due to adverse event | Neutropenia | 12 | 7 | 0 | 1 | 0 | 20 |
| Hypertension | 1 | 1 | 0 | 1 | 0 | 3 |
| Thrombosis | 6 | 3 | 0 | 0 | 1 | 10 |
| Hemorrhage | 18 | 9 | 2 | 0 | 0 | 29 |
| Other | 44 | 53 | 26 | 12 | 2 | 137 |
| **Total** | 81 | 73 | 28 | 14 | 3 | 199 (32%) |
| Discontinued treatment due to withdrawal or other reason | | 32 | 43 | 20 | 6 | 10 | 111 (18%) |
